# Supplementary material for: Characteristics of flexible ZnO nanorod UV photodetectors processed by using a direct silicon etching transfer method
Source: Royal Society of Chemistry journal article supplement (doi:10.1039/d2tc00377e), 2022-01-01
Supplement: d2tc00377e1.pdf [file d2tc00377e1.pdf]

# Characteristics of flexible ZnO nanorod UV photodetectors processed by using a direct silicon etching transfer method

*Hun Jang,<sup>a,b</sup> Do-Kyun Kwon,<sup>a</sup> Do Hoon Kim,<sup>a</sup> and Jae-Min Myoung<sup>a,\*</sup>*

<sup>a</sup> Department of Materials Science and Engineering, Yonsei University, 50 Yonsei-ro,  
Seodaemun-gu, Seoul 03722, Republic of Korea

<sup>b</sup> LG Display LCD Research and Development Center, 245 Lg-ro, Wollong-myeon, Paju-si,  
Gyeonggi-do 10845, Republic of Korea

\*Corresponding author:

E-mail address: [jmmyoung@yonsei.ac.kr](mailto:jmmyoung@yonsei.ac.kr)

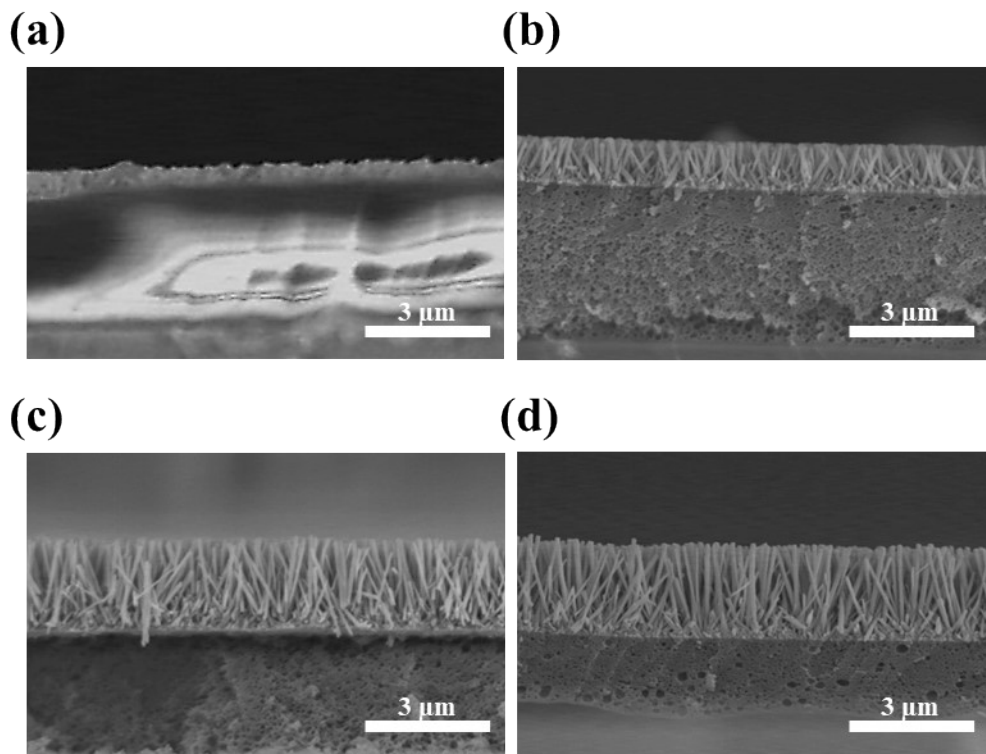

**Fig. S1.** Scanning electron microscopy (SEM) images of the ZnO nanorods (NRs) grown for different times: (a) 30, (b) 60, (c) 90, and (d) 120 min.

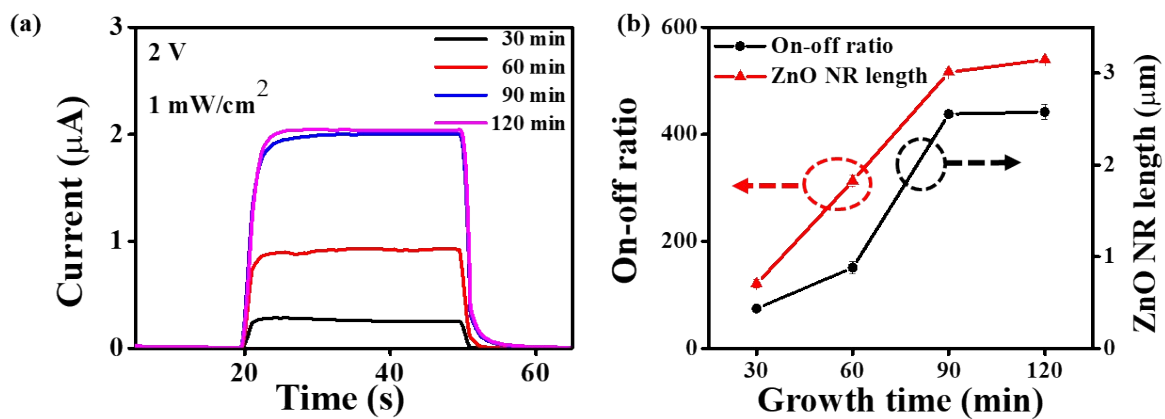

**Fig. S2.** Variation in the UV-sensing properties of the ZnO nanorod (NR) photodetector on a Si substrate with a change in the growth time of the ZnO NRs: (a) UV photoresponse after different growth times and (b) length of the ZnO NRs and on-off ratio with respect to the growth time.

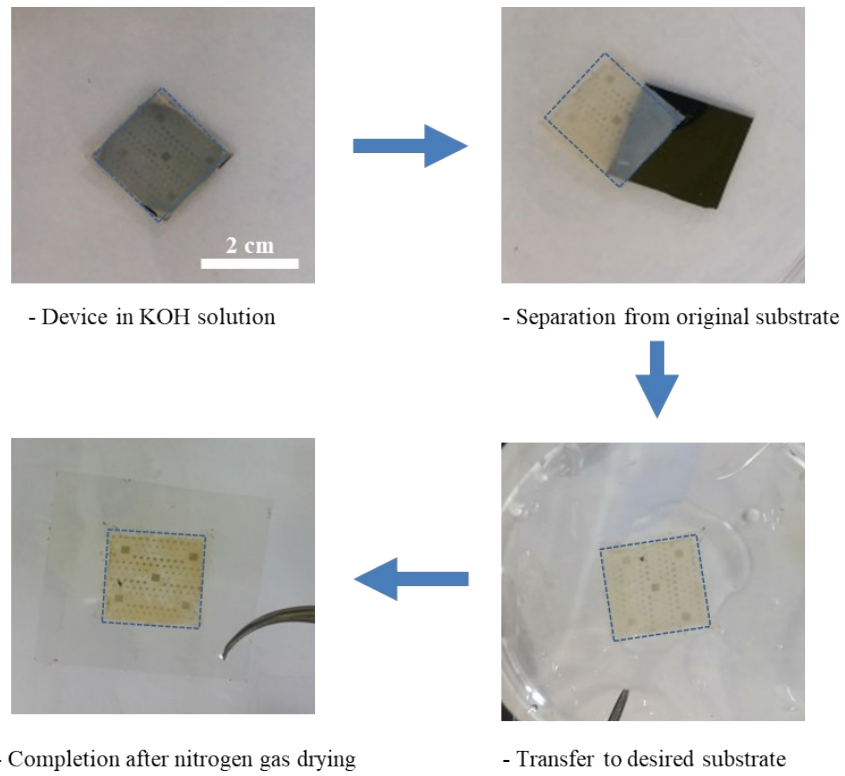

**Fig. S3.** Photographs of the ZnO NR photodetectors captured during the direct silicon etching transfer (DSET) process.

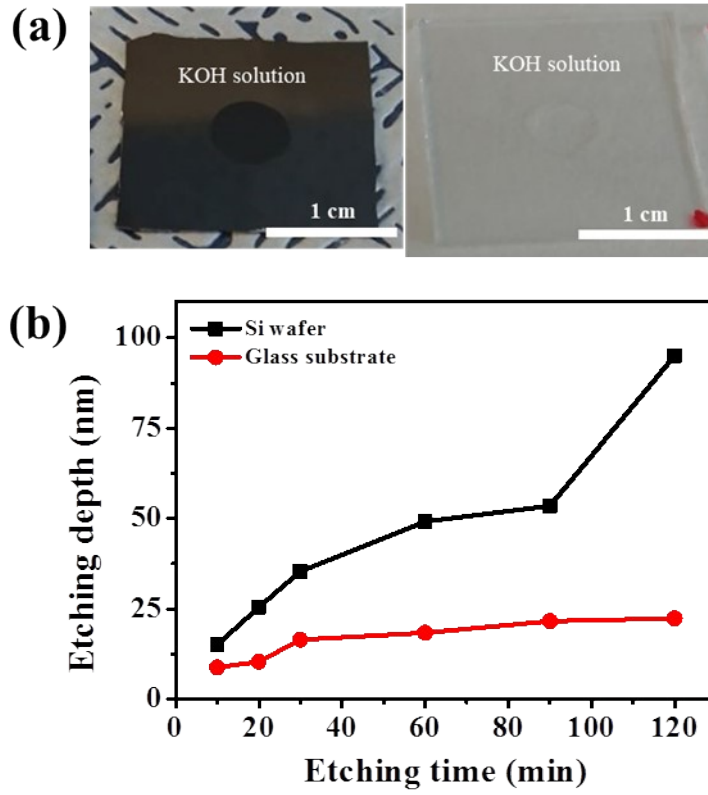

**Fig. S4.** (a) Photographs of a Si wafer and glass substrate in KOH solutions and (b) etching depths of the Si wafer and glass substrates as a function of the etching time in dilute KOH.

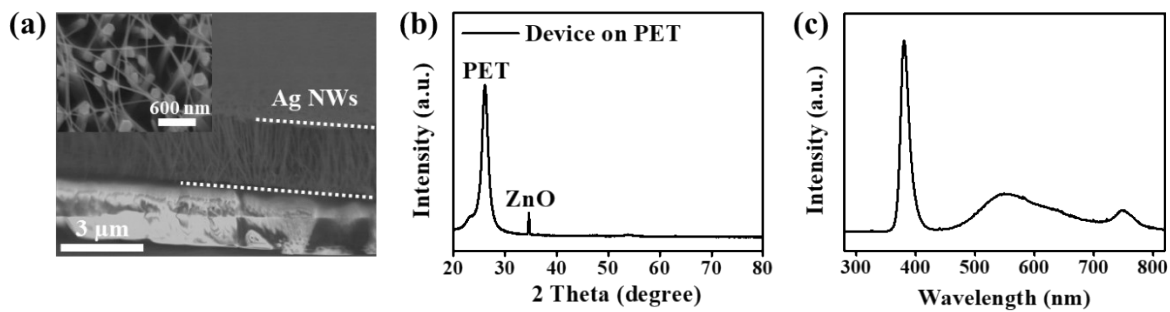

**Fig. S5.** (a) Side-view and top-view (inset) SEM images, (b) X-ray diffraction pattern, and (c) photoluminescence spectra of ZnO NRs transferred to a PET substrate by using the DSET process.

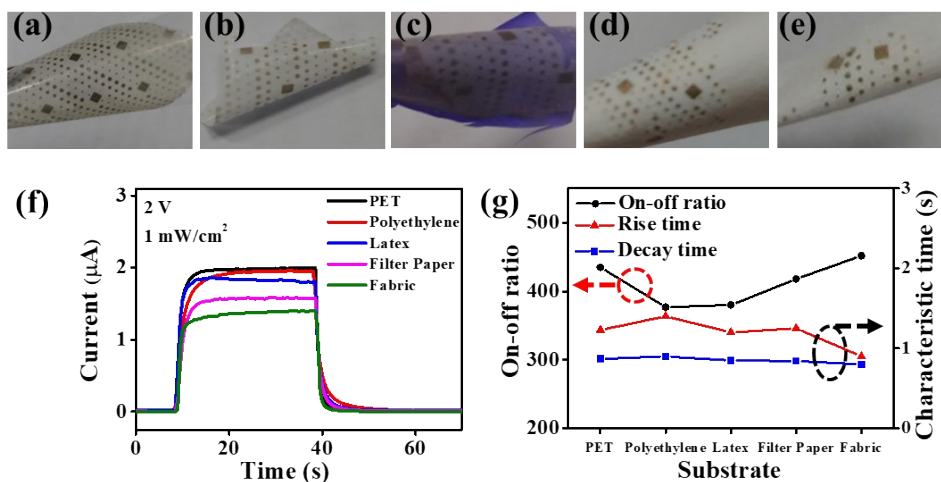

**Fig. S6.** Photographs of the ZnO NR photodetectors on various substrates after their transfer by using the DSET process: (a) PET, (b) polyethylene, (c) latex, (d) filter paper, and (e) fabric. (f) UV photoresponses and (g) on-off ratios, rise times, and fall times of the devices on various substrates.

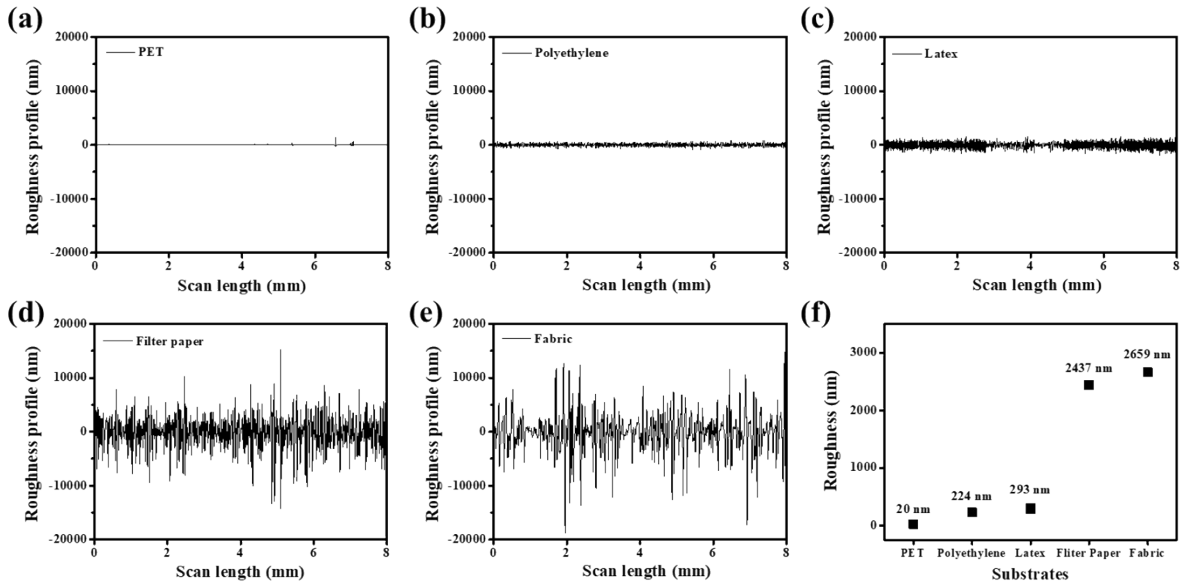

**Fig. S7.** Surface roughness profiles of the ZnO NR photodetectors on various substrates: (a) PET, (b) polyethylene, (c) latex, (d) filter paper, and (e) fabric. (f) Roughness values of various substrates.



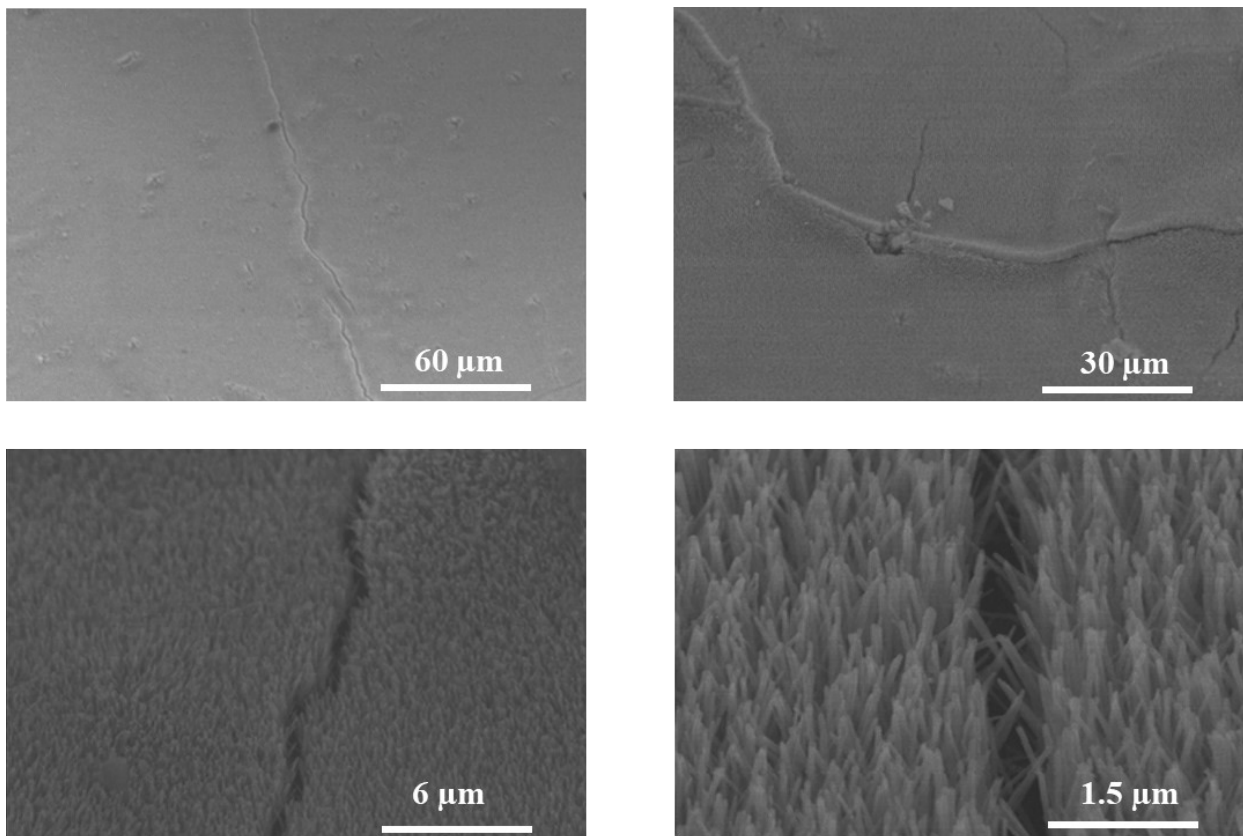

**Fig. S8.** SEM images of the flexible ZnO NR UV photodetector at different magnifications after the dynamic bending test at a bending radius of 1.0 mm.
